# Supplementary material
Source: HighWire-hosted journal article supplement (https://jnm.snmjournals.org/highwire/filestream/94880/field_highwire_adjunct_files/0/166462_Supplemental_Data.pdf)
Supplement: 166462_Supplemental_Data.pdf [file 166462_Supplemental_Data.pdf]

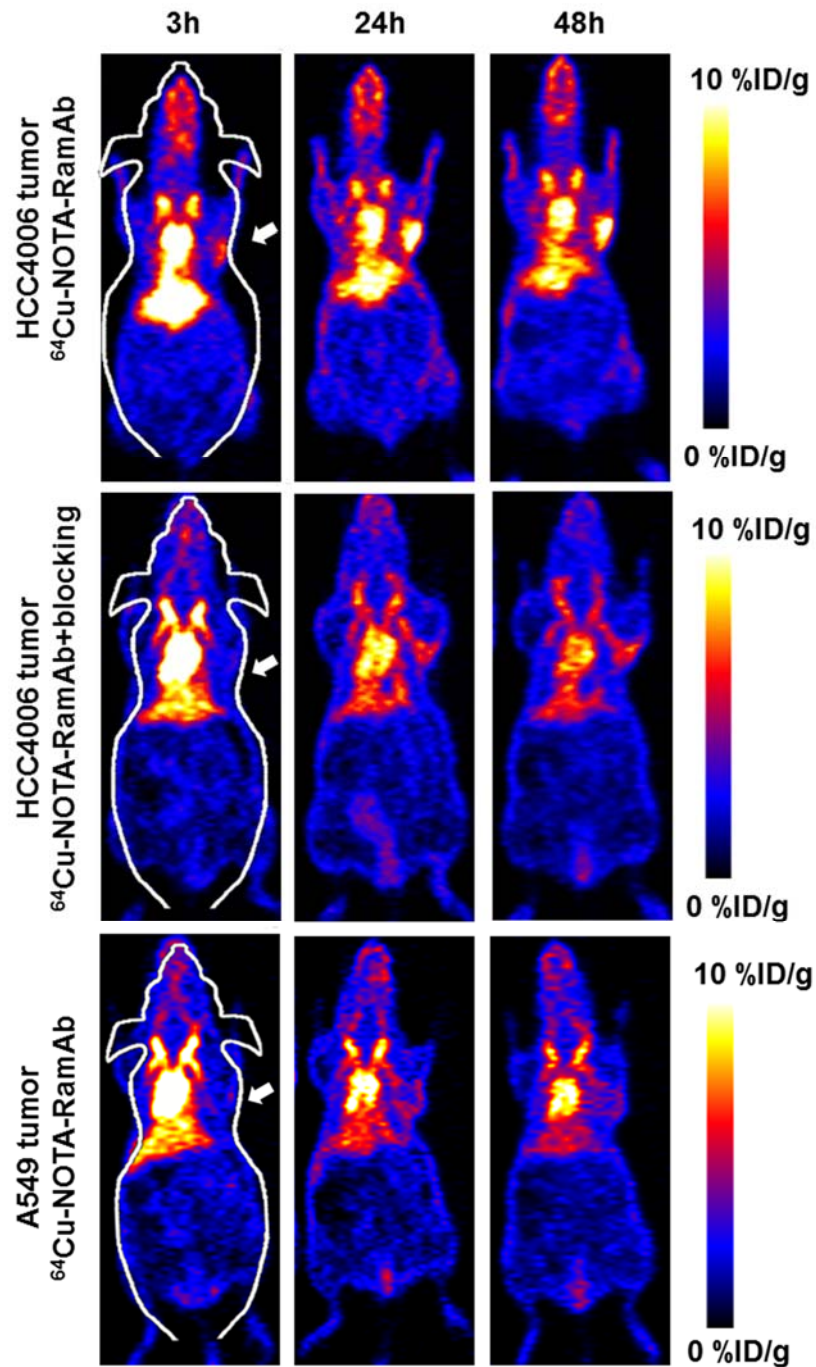

**SUPPLEMENTAL FIGURE 1.** Coronal slices of PET images at 3, 24 and 48 h post-injection of  $^{64}\text{Cu-NOTA-RamAb}$  or RamAb blocking before  $^{64}\text{Cu-NOTA-RamAb}$  are shown, and tumors are indicated by arrows.

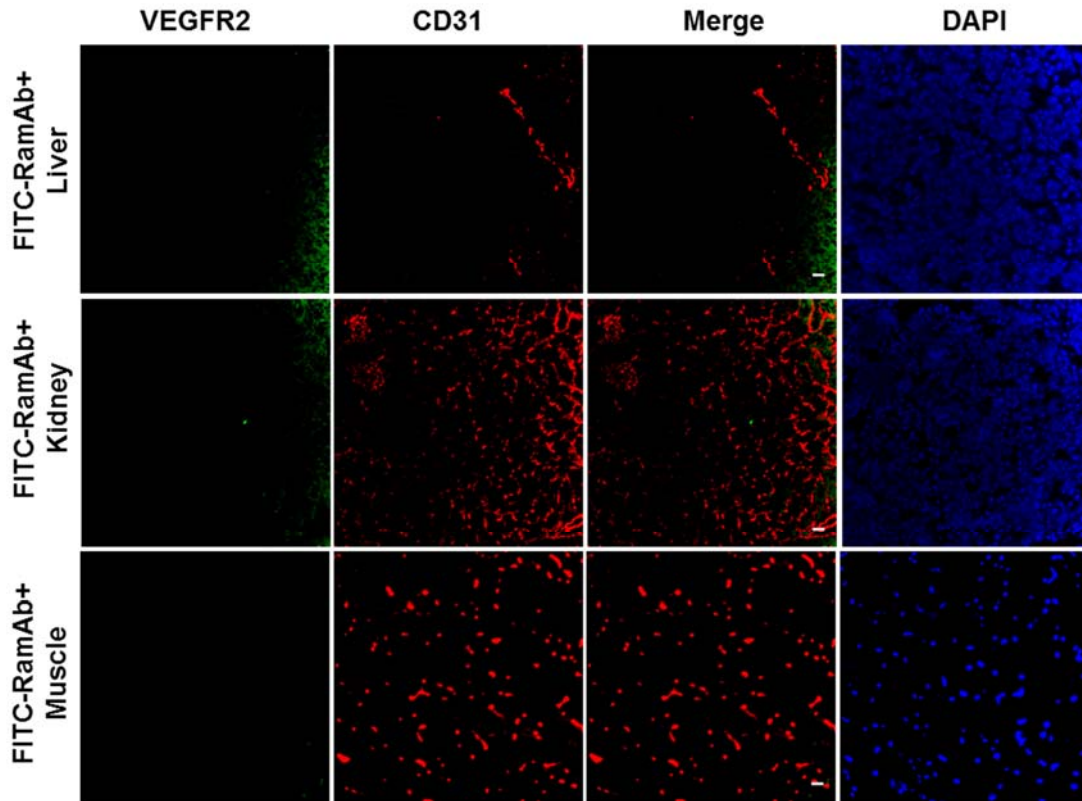

**SUPPLEMENTAL FIGURE 2.** Immunofluorescence of VEGFR-2 staining in tissue sections. FITC-RamAb was used for VEGFR-2 staining (green). The tissue slices were stained with rat anti-mouse CD31 antibody and Cy3-labeled donkey anti-rat IgG (red). DAPI staining was used to reveal the location of cell nuclei. Scale bar: 20  $\mu$ m.

**SUPPLEMENTAL Table 1** Quantitative PET data of tracer uptakes in tumor-bearing nude mice.

| Imaging group                                  | Tissue  | Hours post injection of the tracer |            |           |
|------------------------------------------------|---------|------------------------------------|------------|-----------|
|                                                |         | 3 h                                | 24 h       | 48 h      |
| <sup>64</sup> Cu-NOTA-RamAb<br>(Positive, n=4) | HCC4006 | 3.8 ± 0.5                          | 8.2 ± 0.5  | 9.4 ± 0.5 |
|                                                | Blood   | 13.0 ± 1.4                         | 10.9 ± 0.6 | 9.8 ± 0.6 |
|                                                | Liver   | 10.4 ± 2.2                         | 8.2 ± 0.9  | 7.6 ± 0.8 |
|                                                | Kidney  | 5.1 ± 0.6                          | 5.0 ± 0.3  | 4.7 ± 0.3 |
|                                                | Muscle  | 1.2 ± 0.1                          | 1.5 ± 0.1  | 1.4 ± 0.1 |
| <sup>64</sup> Cu-NOTA-RamAb<br>(Negative, n=3) | A549    | 2.6 ± 0.3                          | 4.2 ± 0.3  | 4.3 ± 0.2 |
|                                                | Blood   | 11.9 ± 0.3                         | 8.0 ± 1.2  | 7.3 ± 1.7 |
|                                                | Liver   | 7.0 ± 0.4                          | 5.4 ± 0.7  | 4.9 ± 1.0 |
|                                                | Kidney  | 4.8 ± 0.1                          | 4.1 ± 0.2  | 3.2 ± 0.6 |
|                                                | Muscle  | 0.9 ± 0.2                          | 1.1 ± 0.3  | 0.9 ± 0.3 |
| <sup>64</sup> Cu-NOTA-RamAb<br>(Blocking, n=3) | HCC4006 | 2.8 ± 1.2                          | 4.2 ± 1.3  | 4.4 ± 1.3 |
|                                                | Blood   | 12.2 ± 0.6                         | 9.1 ± 0.2  | 7.8 ± 0.1 |
|                                                | Liver   | 8.4 ± 0.6                          | 6.6 ± 0.3  | 6.2 ± 0.6 |
|                                                | Kidney  | 4.0 ± 0.6                          | 3.9 ± 0.1  | 3.6 ± 0.2 |
|                                                | Muscle  | 0.8 ± 0.1                          | 1.0 ± 0.2  | 0.9 ± 0.2 |

\*Values are reported as %ID/g (mean ± SD)

**SUPPLEMENTAL Table 2** *Ex vivo* biodistribution of  $^{64}\text{Cu}$ -NOTA-RamAb, 48 h after its i.v administration into HCC4006 or A549 tumor-bearing nude mice.

| <b>Tissue</b> | <b>Positive<br/>(HCC4006)<br/>(n=4)</b> | <b>Negative<br/>(A549)<br/>(n=3)</b> | <b>Blocking<br/>(HCC4006)<br/>(n=3)</b> |
|---------------|-----------------------------------------|--------------------------------------|-----------------------------------------|
| Tumor         | 9.47 ± 2.22                             | 2.24 ± 0.67                          | 2.42 ± 0.78                             |
| Blood         | 11.90 ± 1.92                            | 8.91 ± 2.08                          | 9.99 ± 0.85                             |
| Skin          | 3.96 ± 1.19                             | 2.22 ± 0.73                          | 3.18 ± 0.15                             |
| Muscle        | 0.73 ± 0.31                             | 0.48 ± 0.23                          | 0.42 ± 0.23                             |
| Bone          | 1.35 ± 0.16                             | 0.77 ± 0.26                          | 0.99 ± 0.56                             |
| Heart         | 3.47 ± 1.17                             | 2.12 ± 0.34                          | 2.97 ± 0.34                             |
| Lung          | 2.84 ± 1.58                             | 2.21 ± 0.84                          | 2.46 ± 1.02                             |
| Liver         | 8.16 ± 3.97                             | 3.76 ± 0.95                          | 5.43 ± 0.44                             |
| Kidney        | 5.72 ± 3.69                             | 3.13 ± 0.16                          | 3.31 ± 1.44                             |
| Spleen        | 2.27 ± 0.64                             | 1.92 ± 0.54                          | 1.69 ± 0.60                             |
| Pancreas      | 0.59 ± 0.21                             | 0.92 ± 0.40                          | 0.82 ± 0.16                             |
| Stomach       | 1.05 ± 0.45                             | 0.82 ± 0.11                          | 1.03 ± 0.39                             |
| Intestine     | 1.13 ± 0.50                             | 0.65 ± 0.13                          | 0.90 ± 0.56                             |
| Brain         | 0.54 ± 0.14                             | 0.29 ± 0.23                          | 0.34 ± 0.19                             |

\*Values are reported as %ID/g (mean ± SD)
